# Supplementary material for: Cumulative Spatial and Temporal Analysis of Anthropogenic Impacts in the Protected Area of the Gran Paradiso National Park in the NW Alps, Italy
Source: MDPI journal article supplement (doi:10.3390/land12061124), 2023-05-24
Supplement: s1 [file s1]

## Supplementary materials

**Table S1.** Transcoding between the legend of the Park cartography and the legend of Land Cover Piedmont 2010

| Cartography of GPNP                                              | Land Cover Piedmont 2010                                         | Vulnerability Levels | Weight Value |
|------------------------------------------------------------------|------------------------------------------------------------------|----------------------|--------------|
| Fir forests                                                      | 3121-Fir forests                                                 | 3                    | 0.33         |
| Scrubland and woods of Maple, linden and ash trees               | 3111-Scrubland and woods of Maple, linden and ash trees          | 3                    | 0.33         |
| Mixed hygrophilous woods of broad-leaved trees [incl. cod. 91e0] |                                                                  |                      |              |
| Lentic waters                                                    | 5121-Natural water basins                                        | 1                    | 1            |
| Lentic waters with aquatic vegetation [incl. cod. 3130]          |                                                                  |                      |              |
| Lentic waters partially buried                                   |                                                                  |                      |              |
| Lotic waters                                                     | 5111-Active water bodies (rivers and streams)                    | 1                    | 1            |
| Isolated trees or in small groups of different species           | 3240-Areas with wooded and shrub vegetation in natural evolution | 2                    | 0.66         |
| Cores of standing dead trees                                     |                                                                  |                      |              |
| Disrupted environments                                           | 1332-Remodeled soils and artifacts                               | 4                    | 0            |
| Shrubland (without distinction of species)                       | 3220-Bushes and shrubs                                           | 2                    | 0.66         |
| Sub-arctic shrublands with Salix sp. [cod. 4080]                 |                                                                  |                      |              |

|                                                                                       |                                                                     |   |      |  |
|---------------------------------------------------------------------------------------|---------------------------------------------------------------------|---|------|--|
| Green alder trees                                                                     |                                                                     |   |      |  |
| Larix decidua and/or Pinus cembra forests [cod. 9420]                                 | 3124-Forests of larch and/or Swiss stone pine                       | 3 | 0.33 |  |
| Mountain pine forests (Pinus uncinata) [cod. 9430]                                    |                                                                     |   |      |  |
| Oak forest                                                                            | 3115-Oak woods                                                      | 3 | 0.33 |  |
| Mixed coniferous forests                                                              | 3120-Forests with a prevalence of undifferentiated conifers         | 3 | 0.33 |  |
| Sparse coniferous forests                                                             |                                                                     |   |      |  |
| Mixed forests of conifers and broad-leaved trees                                      | 3130-Mixed forests of conifers and deciduous trees                  | 3 | 0.33 |  |
| Mixed broad-leaved forests                                                            | 3110-Woods with a prevalence of undifferentiated broad-leaved trees | 2 | 0.66 |  |
| Chestnut groves [incl. cod.9260]                                                      | 3112-Chestnut groves                                                | 2 | 0.66 |  |
| Quarry                                                                                | 1310-Mining areas                                                   | 4 | 0    |  |
| Deposits of natural or artificial materials                                           | 1300-Worksites, spaces under construction, excavations              | 4 | 0    |  |
| Buildings                                                                             | 1124-Sparse urban fabric buildings (sparse houses)                  | 4 | 0    |  |
| Bivouacs, mountain huts                                                               |                                                                     |   |      |  |
| Beech forests<br>[incl. cod.9110, cod.9130, cod.9150]                                 | 3118-Beech woods                                                    | 3 | 0.33 |  |
| Subalpine and alpine acidophilic grasslands<br>[incl. cod. 6150, 6230*, 36.33, 36.52] |                                                                     |   |      |  |
| Subalpine and alpine calcicolous grasslands<br>[incl. cod. 6170, 36.12]               | 2310-Stable meadows and pastures                                    | 2 | 0.66 |  |
| Arid and thermophilic grasslands [incl. cod. 6210, 6240*]                             |                                                                     |   |      |  |

|                                                                         |                                                                             |   |      |
|-------------------------------------------------------------------------|-----------------------------------------------------------------------------|---|------|
| Montane grasslands [incl. cod. 6520]                                    |                                                                             |   |      |
| Glaciers [cod. 8340]                                                    |                                                                             |   |      |
| Glaciers covered with debris [cod. 8340]                                | 3350-Glaciers and perennial snows                                           | 1 | 1    |
| Perennial snows                                                         |                                                                             |   |      |
| Calcareous and calc-scists screes                                       |                                                                             |   |      |
| Siliceous screes                                                        | 3330-Areas with sparse vegetation                                           | 1 | 1    |
| Subalpine and alpine heaths [cod. 4060]                                 | 3210-High altitude grasslands and moors                                     | 3 | 0.33 |
| Artifacts and infrastructures                                           | 1123-Sparse urban fabric                                                    | 4 | 0    |
| Hydrophilous tall herb communities of the Alpine plain [cod. 6430 p.p.] | 2310-Stable meadows and pastures<br>3210-High altitude grasslands and moors | 3 | 0.33 |
| Marshes with small acidophilic sedges [cor. 54.4]                       |                                                                             | 3 | 0.33 |
| Marshes with small basophilic sedges [cod. 7230]                        | 4100-Undifferentiated internal humid areas                                  |   |      |
| Water springs [incl. cod. 7220* and 54.11]                              |                                                                             | 1 | 1    |
| Parks, gardens, vegetable gardens, campsites, golf courses              | 1400-Undifferentiated non-agricultural artificial green areas               | 4 | 0    |
| Spruce forests [cod.9410]                                               | 3123-Spruce forests                                                         | 3 | 0.33 |
| Scots pine forests                                                      | 3122-Pine forests                                                           | 3 | 0.33 |
| Reforestation                                                           | 3241-Areas with recent reforestation                                        | 1 | 1    |
| Calcareous and calc-scists cliffs                                       | 3320-Bare rocks, cliffs, outcrops                                           | 1 | 1    |

|                                                                            |                                                                   |   |   |  |
|----------------------------------------------------------------------------|-------------------------------------------------------------------|---|---|--|
| Siliceous cliffs                                                           |                                                                   |   |   |  |
| Roads and trails                                                           | 1221-Road networks and ancillary spaces                           | 4 | 0 |  |
| Structures and facilities for skiing                                       | 1422-Sports facilities (football, athletics, tennis, skiing)      | 4 | 0 |  |
| Transitional peat bogs [cod. 7140]                                         | 4120-Peat bogs                                                    | 1 | 1 |  |
| Pioneer herbaceous vegetation of alpine watercourses<br>[incl. cod. 7240*] |                                                                   |   |   |  |
| Herbaceous riparian vegetation of watercourses [incl.<br>cod. 3220]        | 3310-Beaches, dunes and sands, riverbed islands                   | 1 | 1 |  |
| Woody riparian vegetation of watercourses [incl. cod.<br>3230 and 3240]    |                                                                   |   |   |  |
| Shaded areas                                                               | 3300-Open areas with sparse or absent undifferentiated vegetation | 1 | 1 |  |

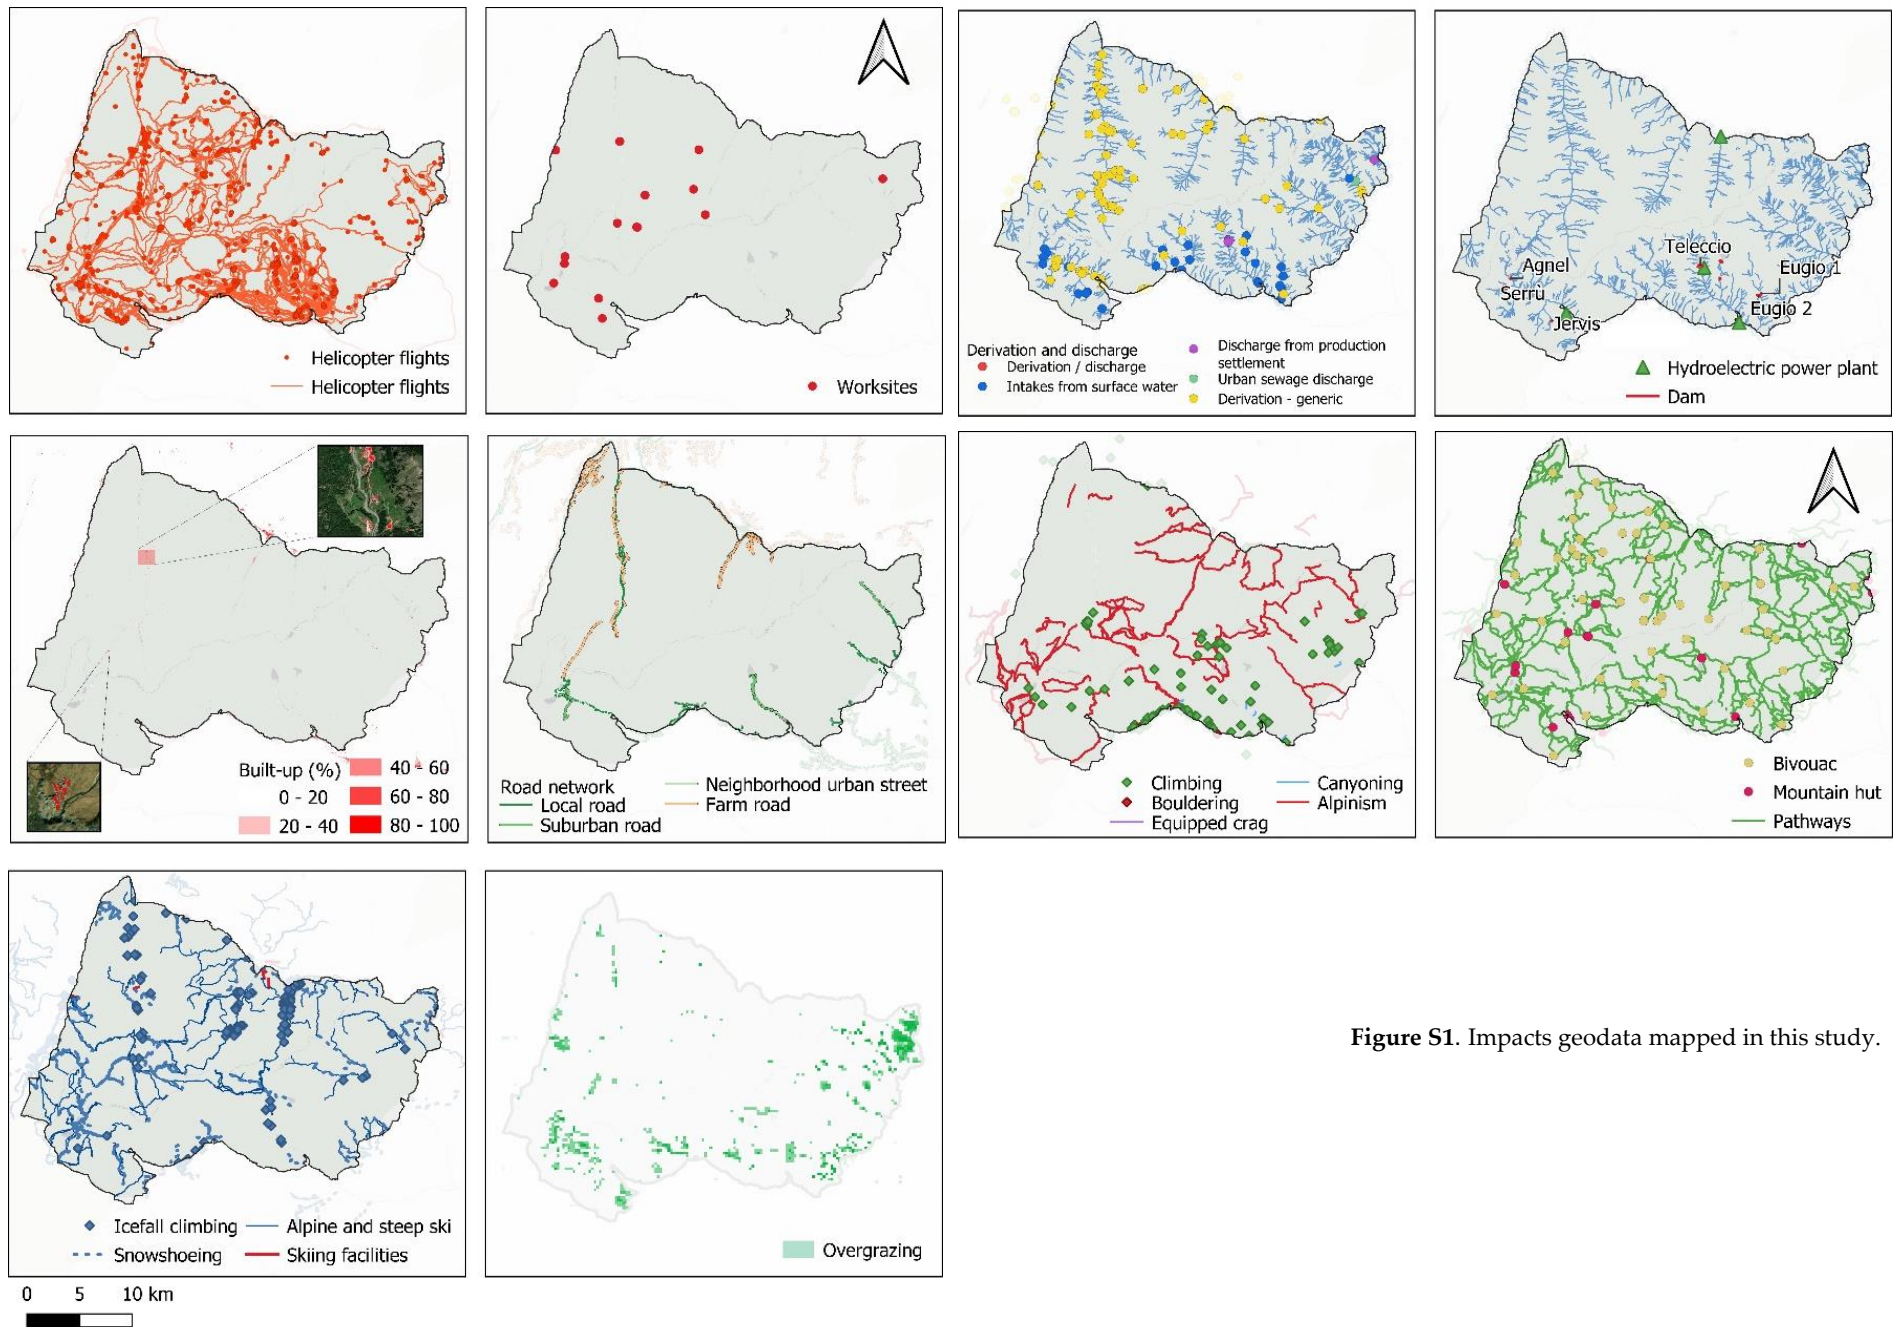

Figure S1. Impacts geodata mapped in this study.
